# Supplementary material for: Construction of an Evaluation Model for the Protective Efficacy of Ovine Brucellosis Vaccines
Source: Research Square preprint supplement (doi:10.21203/rs.3.rs-7705539/v1), 2025-10-30
Supplement: Supplementary file 1 [file 5c46fdf08278848f5010ca33.docx]

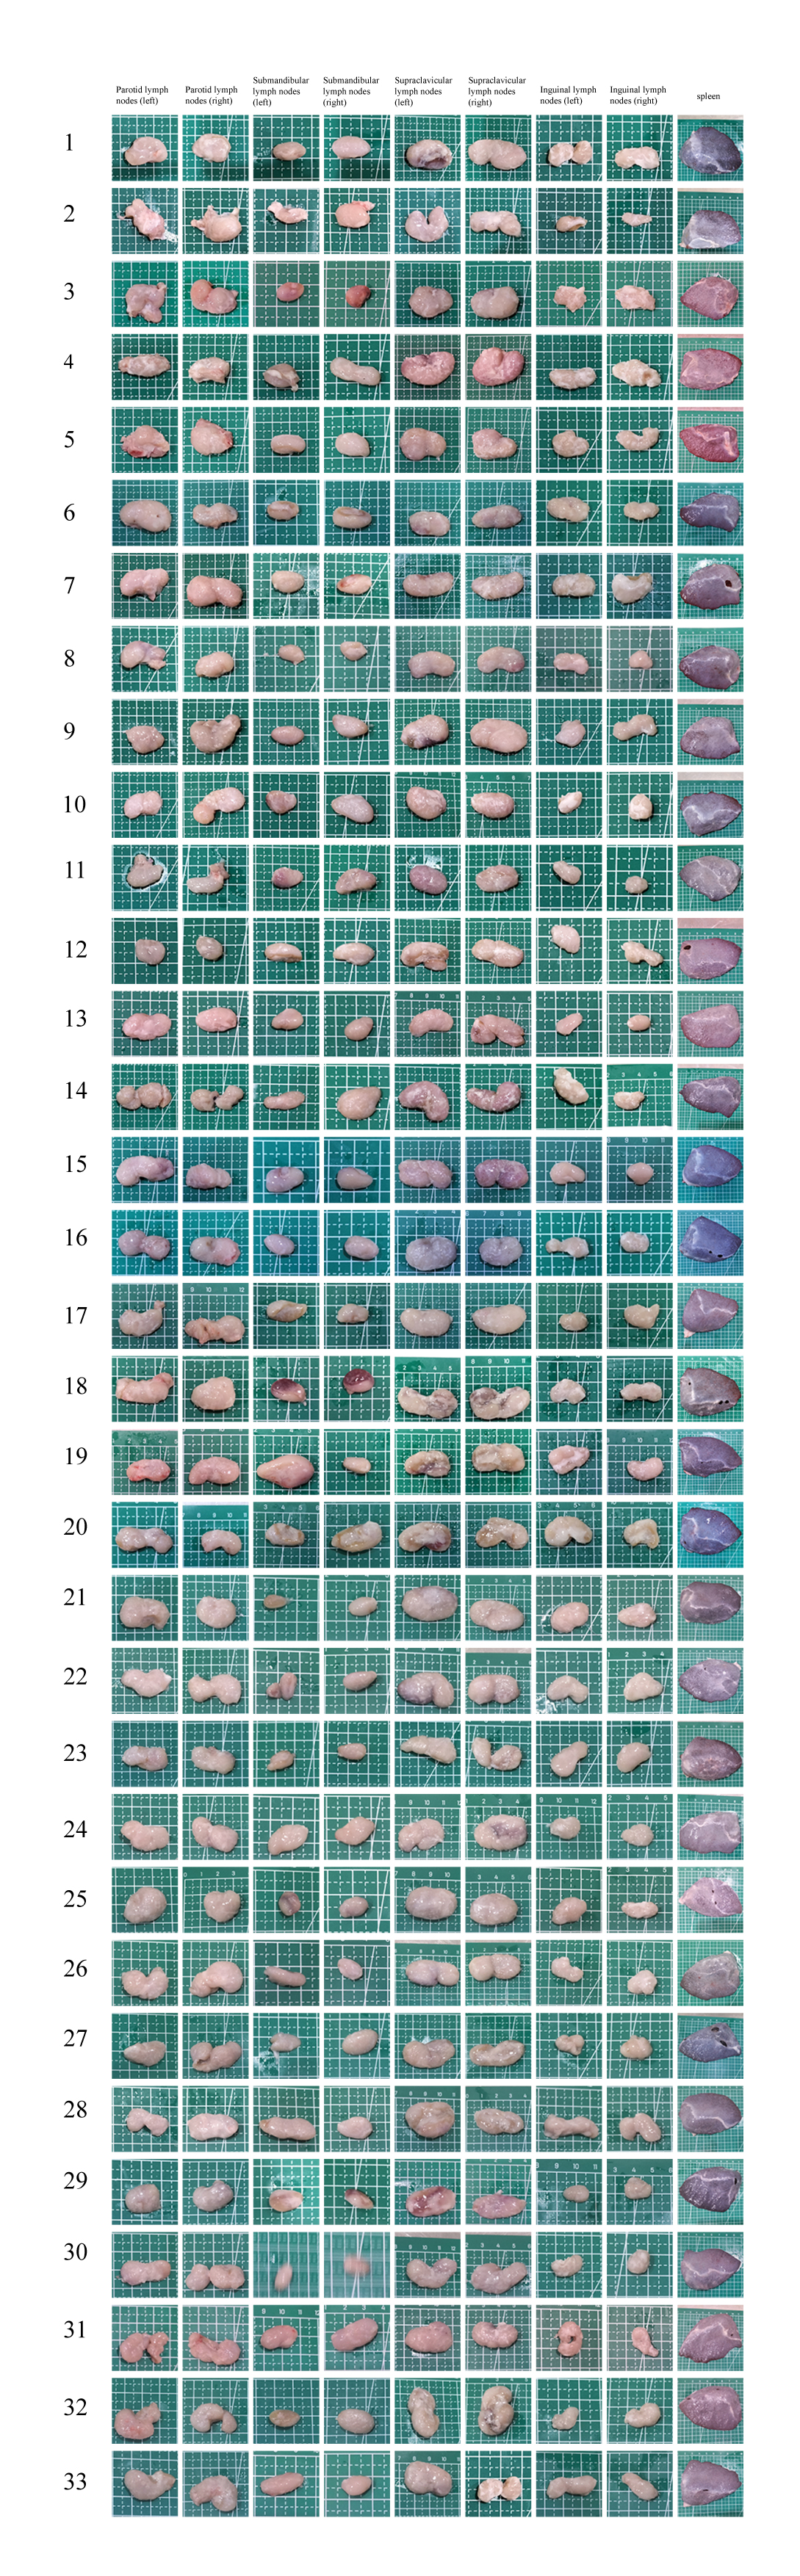


**Figure S1.** Samples collected aseptically from LPLN, RPLN, LSLN, RSLN, LSpLN, RSpLN, LILN, RILN, and splenic tissue at 0, 3, 7, 15, 30, and 45 days post-infection.


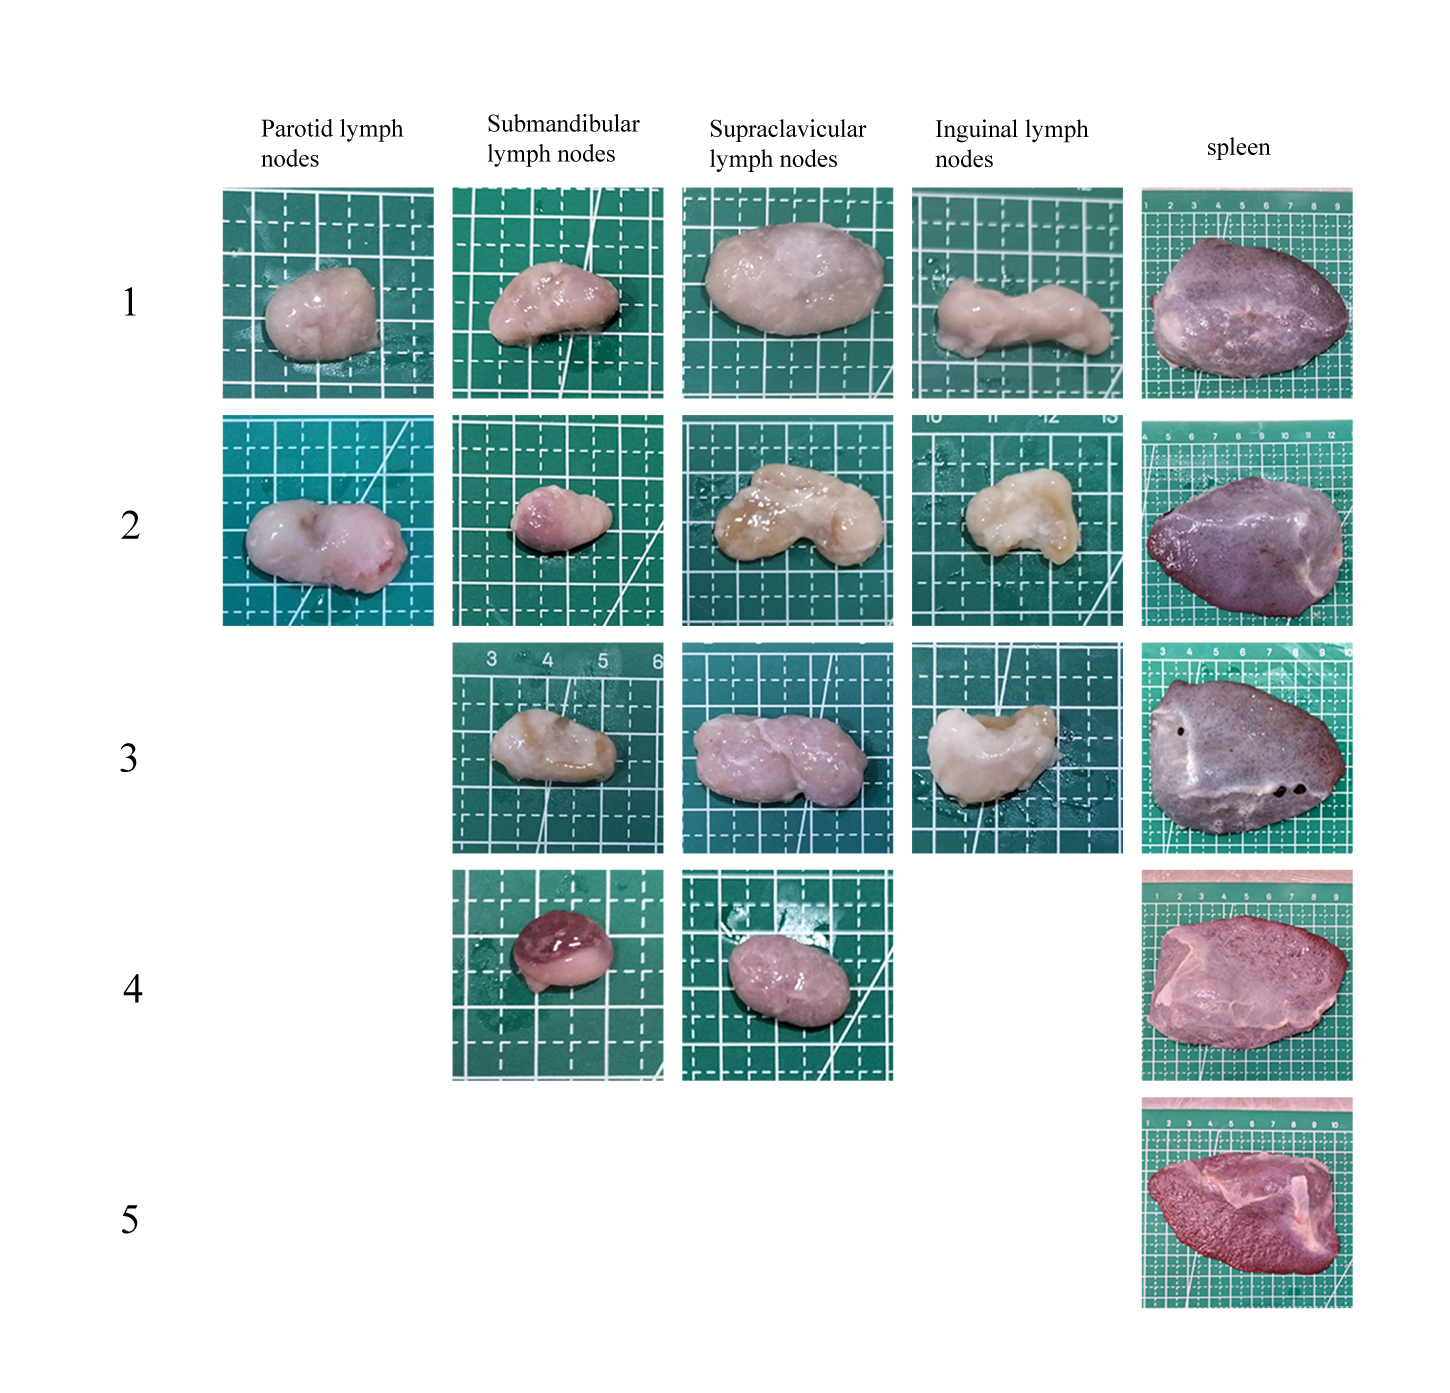


**Figure S2.** Tissue reference standards corresponding to each grade of gross anatomy scoring.

**Table S1. Gross Anatomical Score**

| **Tissue** | **Scoring Parameter** | **Scoring Criteria** | **Score** |
| --- | --- | --- | --- |
| Lymph node | Color | Entirely white | 0 |
| Areas exhibiting light brown/tan or pale red coloration, accounting for less than 50% of the total tissue area | 1 |
| Areas exhibiting yellowish-brown or reddish coloration, accounting for less than 50% of the total tissue area | 2 |
| Areas exhibiting yellowish-brown or reddish coloration, accounting for more than 50% of the total tissue area | 3 |
| Score 4: Entirely deep red | 4 |
| Area Change | Area size is essentially similar to the control | 0 |
| Area is reduced by less than 0.6-fold or increased by more than 1.7-fold but less than 2.25-fold compared to the control | 1 |
| Area is increased by more than 2.25-fold compared to the control | 2 |
| Spleen | Hemorrhagic Spots | Smooth surface, no red spots | 0 |
| A few scattered red spots on the surface | 1 |
| A small number of red spots on the surface | 2 |
| A large number of red spots on the surface | 3 |
| Marginal Reddening | Normal color at the margin | 0 |
| Reddened area accounts for less than 50% of the entire tissue margin | 1 |
| Reddened area accounts for more than 50% of the entire tissue margin | 2 |

**Table S2. Histopathological Score Criteria**

| **Scoring Parameter** | **Scoring Criteria** | **Score** |
| --- | --- | --- |
| Inflammation Severity | No significant inflammatory cell infiltration observed within the field of view | 0 |
| Minor inflammatory cell infiltration observed (number of inflammatory cells per field < 10) | 1 |
| Moderate inflammatory cell infiltration compared to control (number of inflammatory cells per field between 10 and 20, inclusive) | 2 |
| Severe inflammatory cell infiltration (number of inflammatory cells per field ≥ 20) with a certain degree of cellular structural damage | 3 |
| Cyst Formation | No cystic structures present | 0 |
| Cysts are small in size and sparse in number | 1 |
| Cysts are moderate in both size and number | 2 |
| Cysts are large in size and numerous | 3 |
| Bacterial Load | No bacteria observable | 0 |
| Occasional observation of a small number of bacteria | 1 |
| Bacteria observable in multiple fields, but the quantity is relatively low and no bacterial clusters are formed | 2 |
| A large number of bacteria observable, with the presence of bacterial clusters | 3 |
| Fibrosis | No fibrotic structures observed | 0 |
| Mild fibrosis observed | 1 |
| Moderate fibrosis with noticeable hyperplasia | 2 |
| Severe fibrosis with significant hyperplasia, where the original architecture is substantially compressed or even replaced by proliferative tissue | 3 |
| Hemorrhage | No erythrocytes observed outside vascular structures | 0 |
| Occasional, scattered erythrocytes discernible in extravascular structures | 1 |
| Clusters or diffusely distributed erythrocytes present in substantial areas of extravascular tissue | 2 |
| Extensive erythrocyte clusters or diffuse infiltration observable in extravascular tissue, with prominent hemosiderin deposition clearly visible | 3 |
| Lymphoid Follicles | Normal number and size of lymphoid follicles | 0 |
| Slightly reduced number and mildly decreased size of lymphoid follicles | 1 |
| Markedly reduced number and significantly decreased size of lymphoid follicles | 2 |
| Architecture of lymphoid follicles is severely disrupted | 3 |
| Intracellular Inclusions | No intracellular inclusions observed | 0 |
| Intracellular inclusions occasionally observed | 1 |
| Intracellular inclusions observed in multiple fields | 2 |
| Abundant intracellular inclusions observed | 3 |
| Nuclear Chromatin Margination | No cells exhibiting nuclear chromatin margination observed | 0 |
| Cells exhibiting nuclear chromatin margination occasionally observed | 1 |
| Cells exhibiting nuclear chromatin margination observed in multiple fields | 2 |
| Abundant cells exhibiting nuclear chromatin margination observed | 3 |
